# Supplementary material for: Arthroscopic versus open cancellous bone grafting for scaphoid delayed/nonunion in adults (SCOPE-OUT): study protocol for a randomized clinical trial
Source: Springer Nature journal article supplement (doi:10.1186/s13063-023-07281-5), 2023-04-14
Supplement: MOESM3 [file 25244202]

Morten Kjær  
Sendt digitalt

**Afsnit** Sekretariatet  
**Telefon** 3866 6395  
**Direkte** 3866 6395  
**Web** www.regionh.dk

Journal-nr.: H-21075664

Dato: 21-09-2022

**H-21075664 - Kikkertassisteret versus åben kirurgisk rekonstruktion med knogletransplantat i behandlingen af bådbenets manglende heling efter brud (scaphoideum pseudoartrose)**

The Committees on Health Research Ethics in the Capital Region of Denmark hereby confirm that above research project is approved and registered to be completed by 1<sup>st</sup> of June 2027.

Generally, an approved project is valid throughout the accepted period, and a regular confirmation of the approval does not take place. Unless otherwise stated, the approval includes all documents listed in the approval letter. **Extension of a study might be approved when applied for later.**

According to Danish law all health research, taking place in Denmark, must be approved by an Ethical Committee and must comply with Danish legislation. Please note, that "GCP" and "ICH-GCP" rules are only partially implemented in Danish law.

For additional inquiries, please contact the Secretariat for the Committees on Health Research Ethics in the Capital Region at +45 3866 6395 or by e-mail [vek@regionh.dk](mailto:vek@regionh.dk)

Kind regards,



Dorthe Frisvad  
Sekretær

The Secretariat for

The Committees on Health Research Ethics in the Capital Region of Denmark
