# Supplementary material for: Arthroscopic versus open cancellous bone grafting for scaphoid delayed/nonunion in adults (SCOPE-OUT): study protocol for a randomized clinical trial
Source: Springer Nature journal article supplement (doi:10.1186/s13063-023-07281-5), 2023-04-14
Supplement: MOESM5 [file 25244202]

**Morten Kjær**  
**Afd. for Led og Knoglekirurgi**

Dato: 1. april 2022

**Vedr.: Uddeling af ph.d.-stipendium fra Interne forskningsmidler**

Kære Morten Kjær

Det er en glæde at kunne meddele dig, at Forskningsrådet på Herlev og Gentofte Hospital har tildelt dig 6 måneders løn svarende til i alt 289.885,08 kr. fra de Interne forskningsmidler forår 2022 til projektet i Afd. for Led og Knoglekirurgi:

***Scaphoid non-union: Treatment challenges and long-term consequences***

**Sådan anvender du din tildeling**

1. Aftal med din afdelingsledelse hvornår bevillingen skal bruges inden for en samlet 6 måneders periode på 24 måneder fra dags dato.
2. Herefter beder I afdelingens lønansvarlige om at indtaste din start- og slutdato i Personaleweb på med lønkoden ÅKUE. Dette tildelingsbrev lægges samtidig i personalesagen. NB! Denne lønkode må *ikke* bruges til udbetaling af 6. ferieuge og ekstra vagter.
3. Samtidig orienteres Forskningsenheden om start og slut på mail til HGH-FP-Forskning@regionh.dk

Du bedes udfylde og indsende vedlagte afrapporteringsskema til Forskningsrådet senest 1 måned efter perioden er slut. Publikationer om projektet skal tydeligt angive, at de udgår fra Herlev og Gentofte Universitetshospital.

Venlig hilsen på vegne af Forskningsråd Herlev og Gentofte

  
Bodil Ørkild  
Formand for Forskningsrådet

cc: Afdelingsledelsen
